# Supplementary material for: Enhanced UV stability of 2D perovskites (HO(CH2)4NH3)2(MA)n−1PbnI3n+1 due to hydrogen bonding
Source: Royal Society of Chemistry journal article supplement (doi:10.1039/d2nj05013g), 2023-01-01
Supplement: d2nj05013g1.pdf [file d2nj05013g1.pdf]

## Enhanced UV Stability of 2D Perovskites

### $(\text{HO}(\text{CH}_2)_4\text{NH}_3)_2(\text{MA})_{n-1}\text{Pb}_n\text{I}_{3n+1}$ by Hydrogen Bonds

Kaimeng Yang,<sup>a,b,†</sup> Baiyi Shao,<sup>c,†</sup> Aoping Guo,<sup>a</sup> Fangming Cui<sup>\*,b</sup> and Xiaojing Yang<sup>\*,a</sup>

<sup>a</sup>

<sup>a</sup> Beijing Key Laboratory of Energy Conversion and Storage Materials, College of Chemistry, Beijing Normal University, 19-Xinjiekouwai Street, Haidian, Beijing 100875, China.

<sup>b</sup> Qian Xuesen Laboratory of Space Technology, China Academy of Space Technology, 104-Youyi Road, Haidian, Beijing 100094, China.

<sup>c</sup> Office of Academic Planning and Development, Beijing University of Chemical Technology, Beijing 100029, China.

<sup>†</sup> These authors contributed equally.

\* Corresponding authors.

Email: [cui.fangming@qxslab.cn](mailto:cui.fangming@qxslab.cn), [yang.xiaojing@bnu.edu.cn](mailto:yang.xiaojing@bnu.edu.cn)

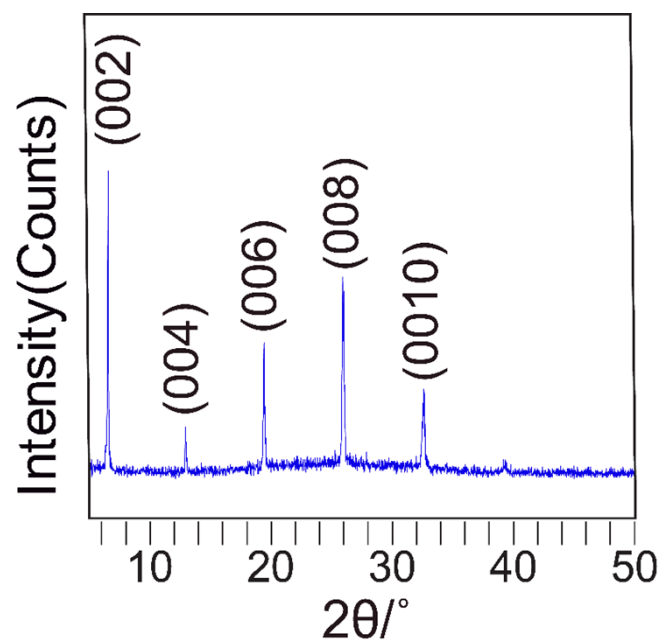

**Figure S1** XRD spectrum of  $(\text{BA})_2\text{PbI}_4$

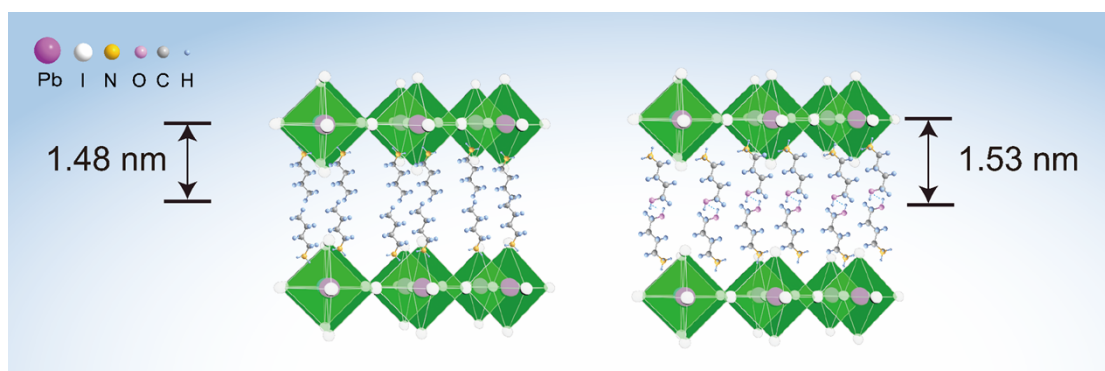

**Figure S2** The illustration of the (002) planes of  $(\text{BA})_2\text{PbI}_4$  and  $(\text{BA-OH})_2\text{PbI}_4$

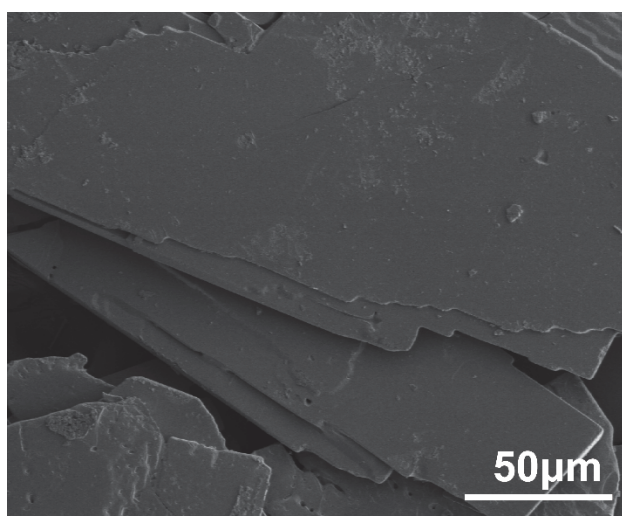

**Figure S3** The SEM image of  $(\text{BA})_2\text{PbI}_4$

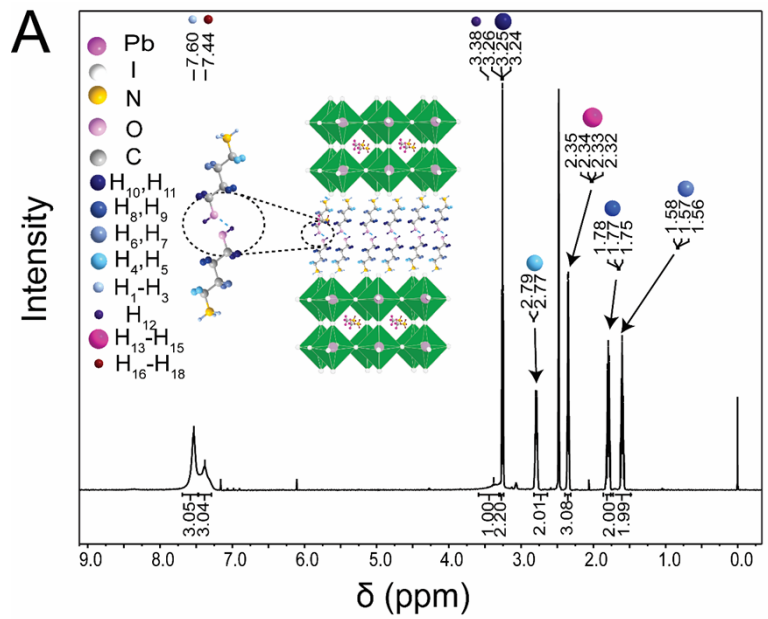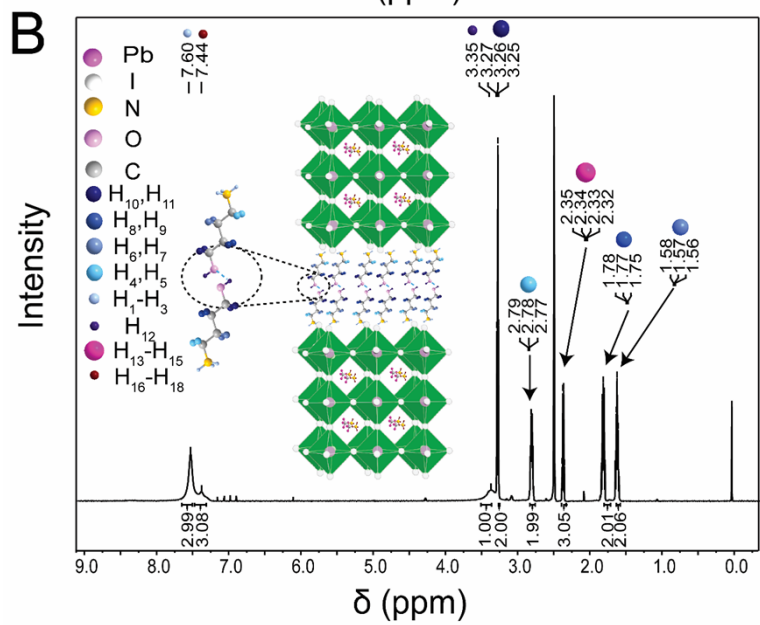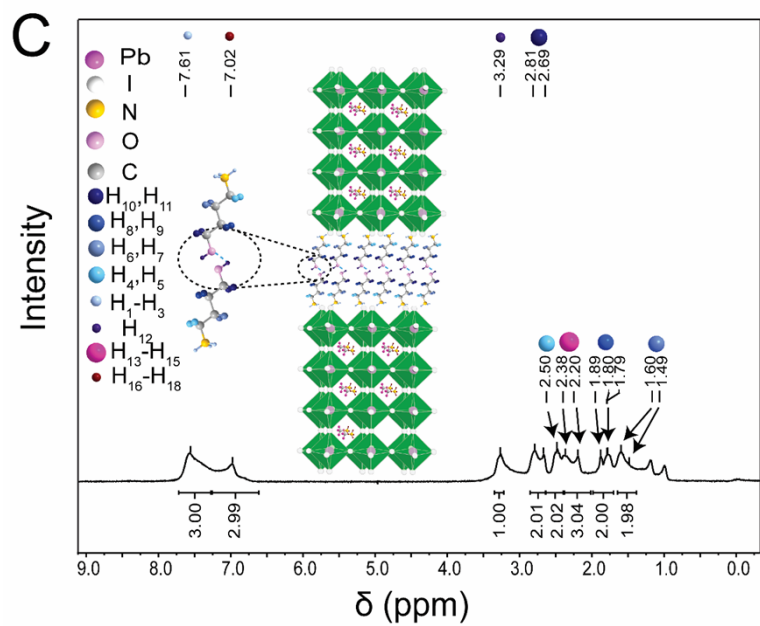

**Figure S4** The  $^1\text{H}$  NMR spectra of  $(\text{BA-OH})_2(\text{MA})_{n-1}\text{Pb}_n\text{I}_{3n+1}$ : (A)  $n=2$ , (B)  $n=3$ , (C)  $n=4$ .

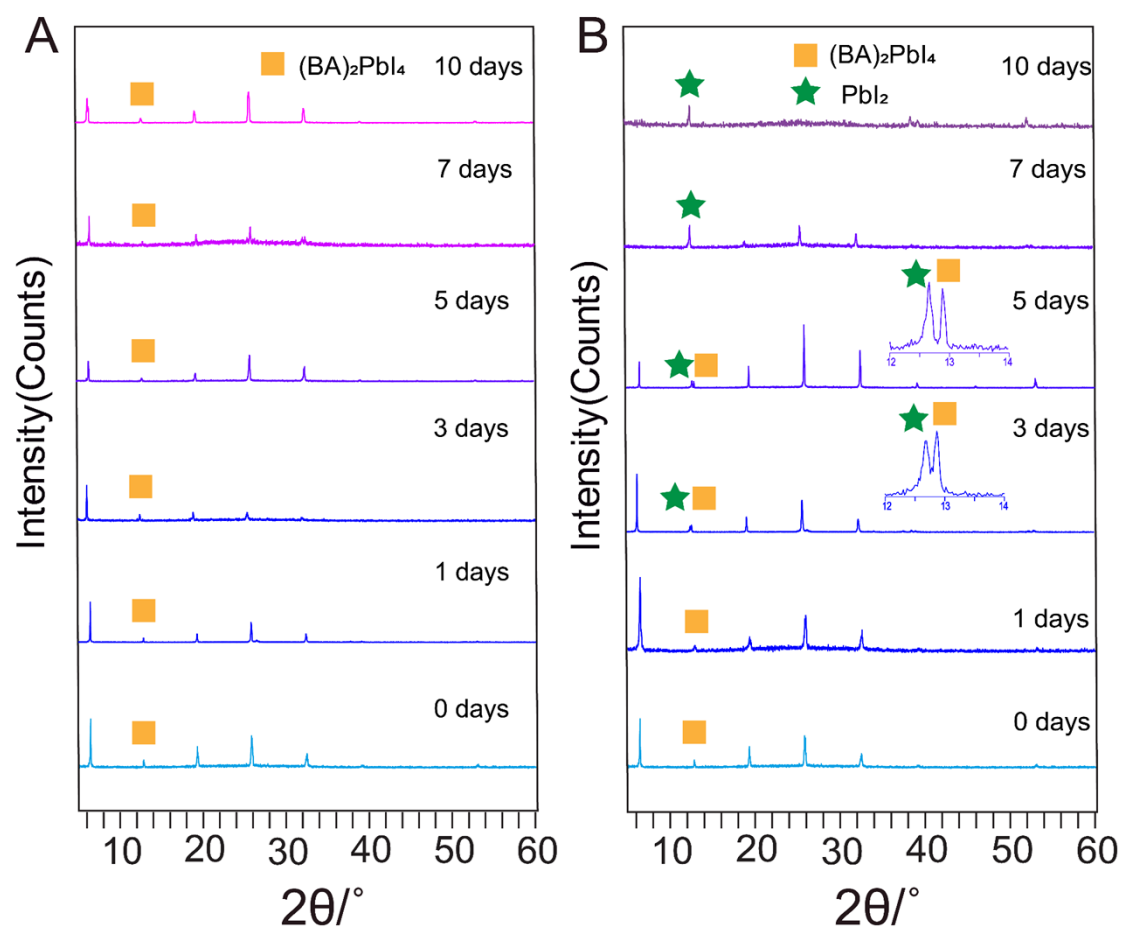

**Figure S5** XRD patterns of  $(\text{BA})_2\text{PbI}_4$  (A) without and (B) with UV irradiation.

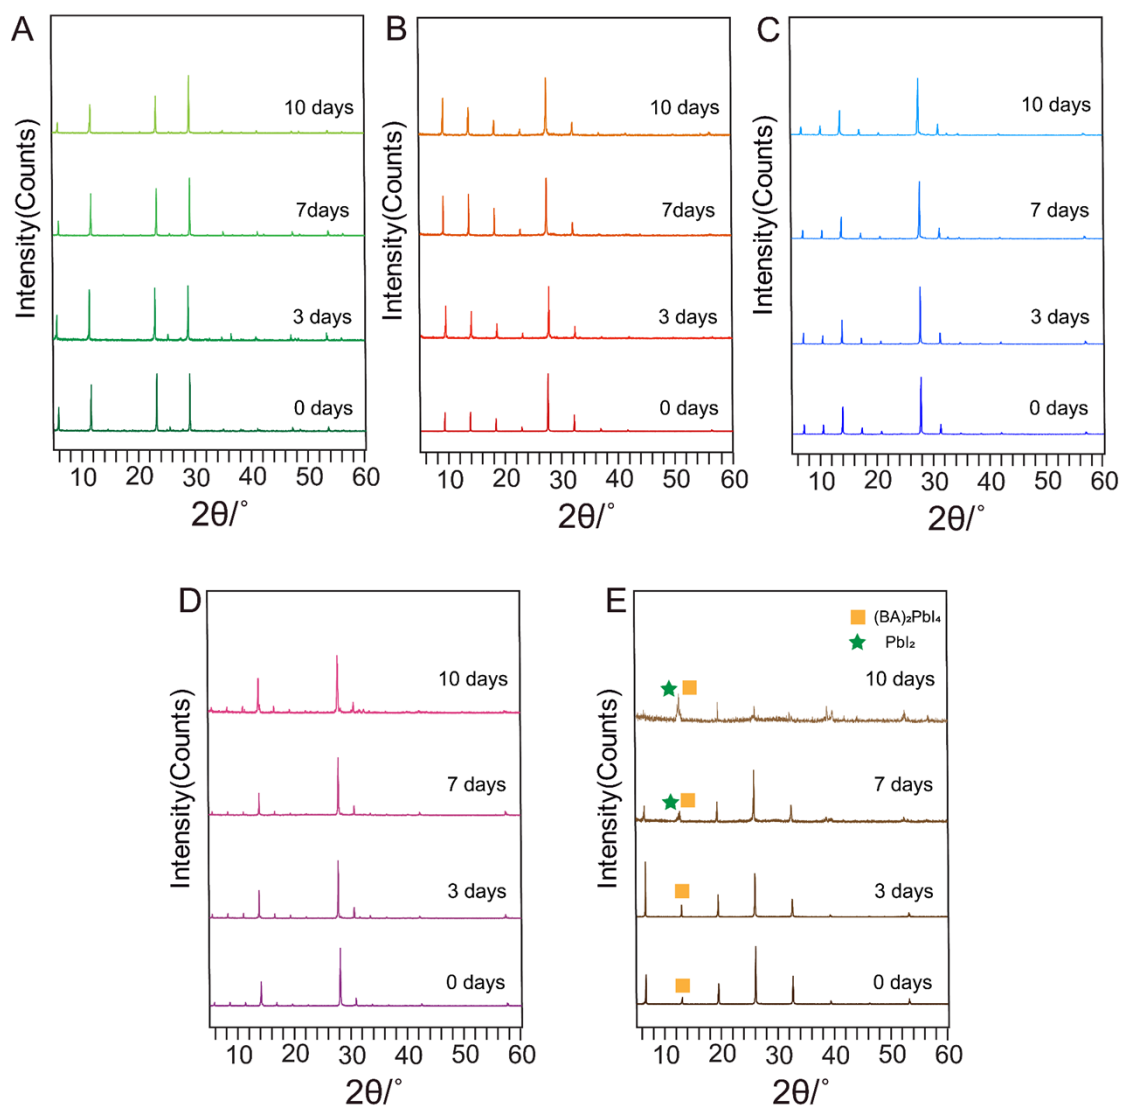

**Figure S6** XRD patterns of  $(\text{BA-OH})_2(\text{MA})_{n-1}\text{Pb}_n\text{I}_{3n+1}$  (A)  $n=1$ , (B)  $n=2$ , (C)  $n=3$ , (D)  $n=4$  and (E)  $(\text{BA})_2\text{PbI}_4$  with UV irradiation from 0 to 10 days (0% RH in a bag filled with  $\text{N}_2$ ).

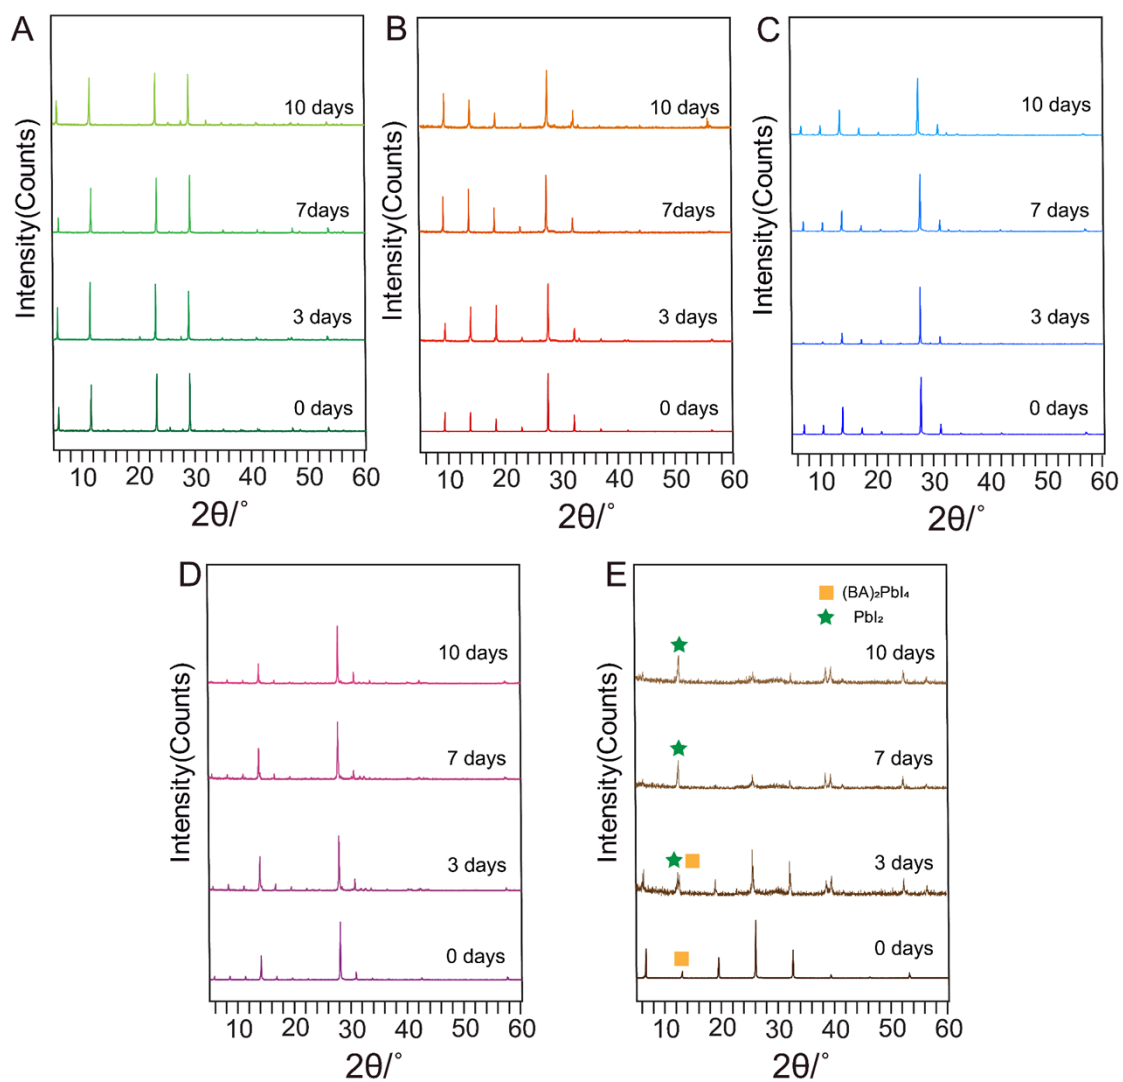

**Figure S7** XRD patterns of  $(\text{BA-OH})_2(\text{MA})_{n-1}\text{Pb}_n\text{I}_{3n+1}$  (A)  $n=1$ , (B)  $n=2$ , (C)  $n=3$ , (D)  $n=4$  and (E)  $(\text{BA})_2\text{PbI}_4$  with UV irradiation from 0 to 10 days (15% RH).

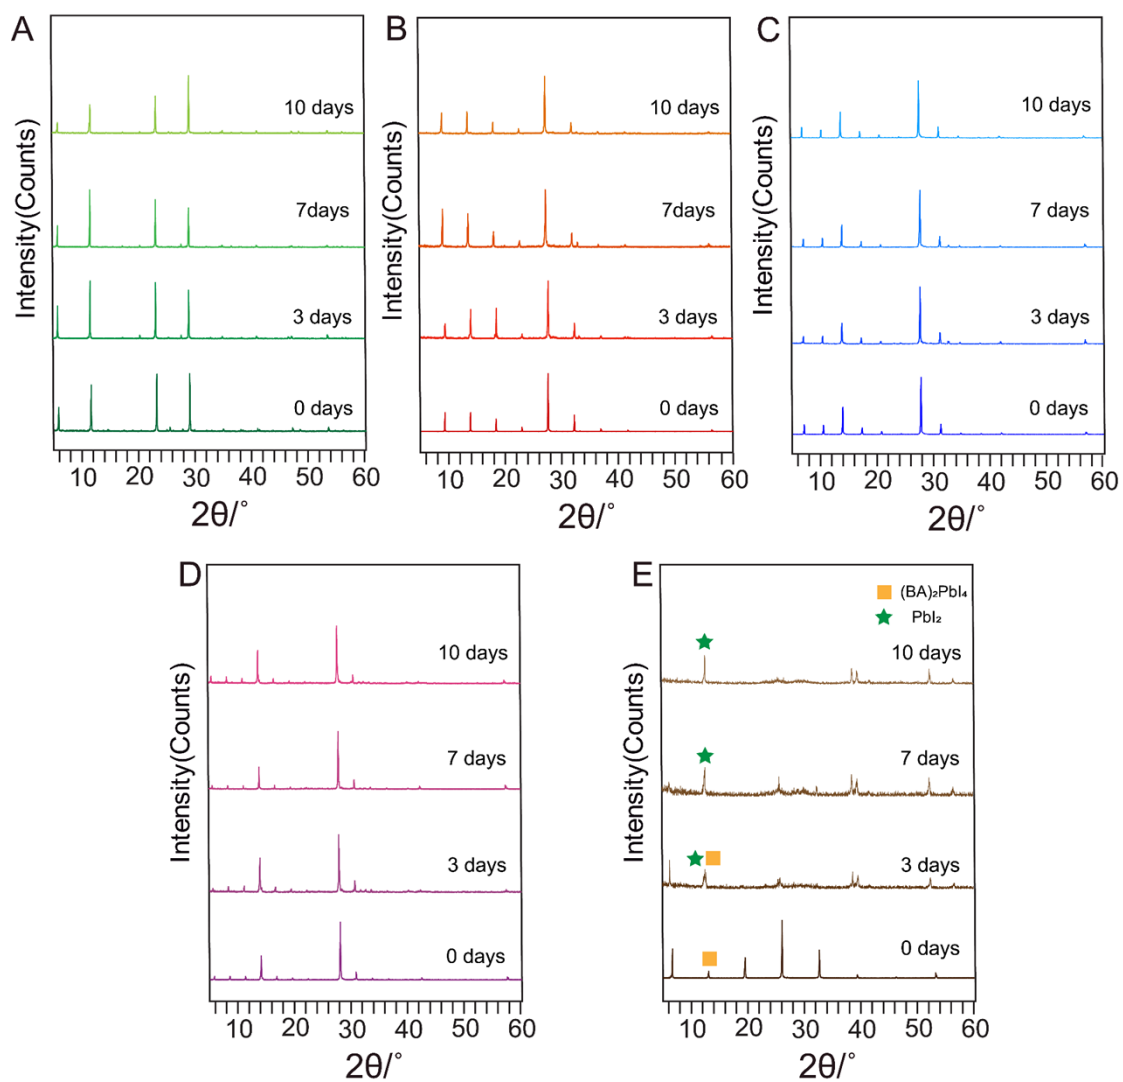

**Figure S8** XRD patterns of  $(\text{BA-OH})_2(\text{MA})_{n-1}\text{Pb}_n\text{I}_{3n+1}$  (A)  $n=1$ , (B)  $n=2$ , (C)  $n=3$ , (D)  $n=4$  and (E)  $(\text{BA})_2\text{PbI}_4$  with higher energy UV light irradiation (254nm) from 0 to 10 days.

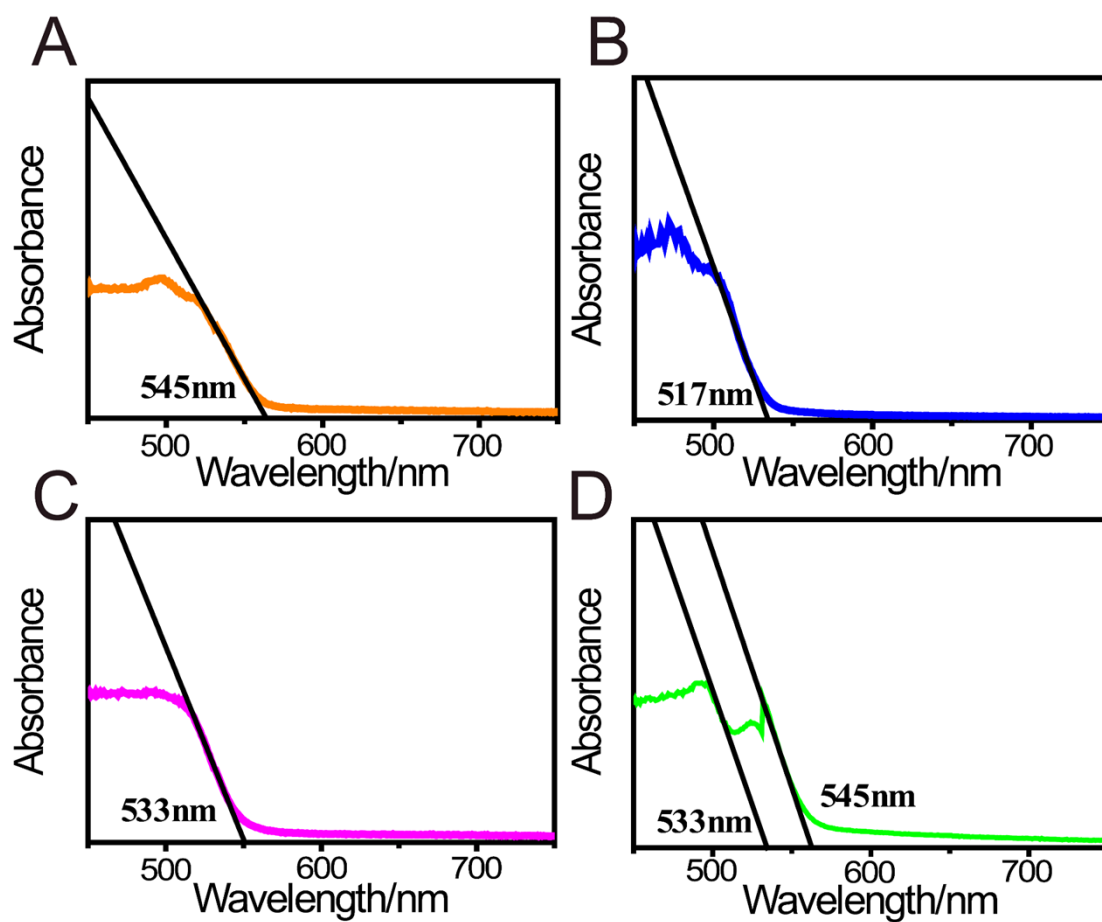

**Figure S9.** UV–Vis absorption spectra of (A)  $(\text{BA})_2\text{PbI}_4$  before UV light irradiation, (B)  $(\text{BA-OH})_2\text{PbI}_4$  after 7 days UV light irradiation, (C)  $\text{PbI}_2$  and (D)  $(\text{BA})_2\text{PbI}_4$  after 7 days UV light irradiation.
